# Supplementary material for: C3–C4 intermediacy in grasses: organelle enrichment and distribution, glycine decarboxylase expression, and the rise of C2 photosynthesis
Source: PubMed Central journal article supplement (PMC4867898; doi:10.1093/jxb/erw150), 2016-04-12
Supplement: supp_erw150_supplementary_tables_S1_S5.pdf [file supp_erw150_supplementary_tables_S1_S5.pdf]

**Supplementary Table S1.** List of species studied in this paper and source of species.

| Species                          | Seed/plant source                                                                                  |
|----------------------------------|----------------------------------------------------------------------------------------------------|
| <i>Dicanthelium oligosanthes</i> | Elizabeth Kellogg, Donald Danforth Plant Science Center St. Louis Missouri, USA                    |
| <i>Panicum bisulcatum</i>        | Mitsutaka Taniguchi, Graduate School of Bioagricultural Sciences, Nagoya University, Nagoya, Japan |
| <i>Steinchisma laxum</i>         | Elizabeth Kellogg, Donald Danforth Plant Science Center St. Louis Missouri, USA                    |
| <i>Steinchisma hians</i>         | Elizabeth Kellogg, Donald Danforth Plant Science Center St. Louis Missouri, USA                    |
| <i>Homolepis aturensis</i>       | Costa Rica, 9°39'27.4"N 82°45'08.0"W                                                               |
| <i>Setaria viridis</i>           | Thomas Brutnell, Donald Danforth Plant Science Center St. Louis Missouri, USA                      |
| <i>Panicum virgatum</i>          | Summerhill Nursery, Toronto, Ontario, Canada                                                       |

**Supplementary Table S2.** Additional species for which RNA-seq data was downloaded and assembled for phylogenetic analysis of the GDC subunit genes, with NCBI SRA run IDs.

| <b>SPECIES</b>                    | <b>NCBI SRA RUN ID</b> | <b>SEQUENCING DEPTH</b>         |
|-----------------------------------|------------------------|---------------------------------|
| <i>Dactylis glomerata</i>         | SRR1632251             | 325.7 Million Paired-End Reads  |
| <i>Dendrocalamus sinicus</i>      | SRR2543019             | 27.4 Million Single-End Reads   |
| <i>Deschampsia antarctica</i>     | SRR1162371             | 29.7 Million Paired-End Reads   |
| <i>Dichanthelium clandestinum</i> | SRR1158317-8           | 112.2 Million Single-End Reads  |
| <i>Elymus nutans</i>              | SRR1336283             | 77.1 Million Paired-End Reads   |
| <i>Elymus sibiricus</i>           | SRR1344836             | 76.7 Million Paired-End Reads   |
| <i>Festuc aarundinacea</i>        | SRR2099408             | 55.1 Million Paired-End Reads   |
| <i>Holcus lanatus</i>             | ERR294017              | 111.7 Million Paired-End Reads  |
| <i>Leersia perrieri</i>           | SRR1171869             | 403.9 Million Paired-End Reads  |
| <i>Leymus arenarius</i>           | SRR1812885             | 141.3 Million Paired-End Reads  |
| <i>Megathyrsus maximus</i>        | SRR821833              | 199.14 Million Paired-End Reads |
| <i>Phyllostachys edulis</i>       | SRR2035327             | 144.3 Million Paired-End Reads  |
| <i>Poa annua</i>                  | SRR1633980             | 258.7 Million Paired-End Reads  |
| <i>Polypogon fugax</i>            | SRR1721962             | 27.2 Million Single-End Reads   |
| <i>Stipa grandis</i>              | SRR1740003             | 66.0 Million Paired-End Reads   |
| <i>Triticum urartu</i>            | ERR420228-9            | 203.3 Million Paired-End Reads  |

**Supplementary Table S3.** Anatomical characteristics of C<sub>3</sub>, C<sub>2</sub>, and C<sub>4</sub> leaves. Values represent mean ± SE, n=3 plants per species. Values followed by the same letter are not different from one another as determined by one-way ANOVA and the Tukey's post-hoc test.

|                             | Species                          | Mesophyll (%) | Bundle Sheath (%) | Mesophyll:Bundle Sheath | Distance between adjacent minor veins (μm) | mesophyll cells # between minor veins |
|-----------------------------|----------------------------------|---------------|-------------------|-------------------------|--------------------------------------------|---------------------------------------|
| C <sub>3</sub> species      | <i>Dicanthelium oligosanthos</i> | 40.0±2 a, b   | 7.2±0.5 a         | 5.7±0.5 a               | 206±6 a                                    | 6.6±0.4 a                             |
|                             | <i>Panicum bisulcatum</i>        | 45 ±1 a       | 10.0±1.2 a        | 5.4±1.0 a               | 240±9 a                                    | 7.4±2.9 a                             |
|                             | <i>Steinchisma laxum</i>         | 39±2 a, b     | 18.0±1.5 b        | 2.4±0.4 b               | 188 ±10 a, c                               | 6.4±0.3 a                             |
| C <sub>3</sub> -proto-Kranz |                                  |               |                   |                         |                                            |                                       |
| C <sub>2</sub> species      | <i>Homolepis aturensis</i>       | 42±2 a        | 18.7±1.1 b        | 2.1±0.2 b               | 139±7 a, c                                 | 3.9±0.4 a, c                          |
|                             | <i>Steinchisma hians</i>         | 40±1a, b      | 21.3±1.3 b        | 2.2±0.1 b               | 129±2 a, c                                 | 4.3±0.2 a, c                          |
|                             | <i>Neurachne minor</i>           | 47±6 b        | 8.5±1.3 a         | 6.5±1.5 a               | 100±19                                     | 2.5±0.3                               |
| C <sub>4</sub> species      | <i>Panicum virgatum</i>          | 35±1 b        | 20.9±1.0 b        | 1.8±0.1 b               | 123±3 b                                    | 2.0±0.0* b, c                         |
|                             | <i>Setaria viridis</i>           | 46±1 a        | 10.1±0.7a         | 4.7±0.4 a               | 84±4 b, c                                  | 2.0±0.2 b, c                          |

\* There is one colorless cell between the two mesophyll cells of *P. virgatum*.

**Supplementary Table S4. Characteristics of bundle sheath organelle positioning:** Values represent mean  $\pm$  SE, n=3 plants per species. Values followed by the same letter are not different from one another as determined by one-way ANOVA and the Tukey's post-hoc test.

|                            | Species                          | Coverage of Inner Half of Cell Area, % | Proportion in Inner Half of Cell Area, % |
|----------------------------|----------------------------------|----------------------------------------|------------------------------------------|
| C <sub>3</sub> species     | Chloroplasts                     |                                        |                                          |
|                            | <i>Dicanthelium oligosanthes</i> | 1.3 $\pm$ 0.2 a                        | 38.6 $\pm$ 6.0 a                         |
|                            | <i>Panicum bisulcatum</i>        | 3.4 $\pm$ 0.3 b, c                     | 47.5 $\pm$ 3.2 a                         |
| C <sub>3</sub> -Protokranz | <i>Steinchisma laxum</i>         | 2.1 $\pm$ 0.2 a, c                     | 52.5 $\pm$ 2.7 a, b                      |
| C <sub>2</sub> species     | <i>Steinchisma hians</i>         | 7.2 $\pm$ 0.5 b                        | 60.6 $\pm$ 2.8 b                         |
|                            | <i>Homolepis aturensis</i>       | 5.1 $\pm$ 0.5 b                        | 62.2 $\pm$ 2.6 b                         |
| C <sub>3</sub> species     | Mitochondria                     |                                        |                                          |
|                            | <i>Dicanthelium oligosanthes</i> | 0.20 $\pm$ 0.03 a                      | 68.8 $\pm$ 4.7 a                         |
|                            | <i>Panicum bisulcatum</i>        | 0.18 $\pm$ 0.03 a                      | 65.2 $\pm$ 5.8 a                         |
| C <sub>3</sub> -Protokranz | <i>Steinchisma laxum</i>         | 0.27 $\pm$ 0.02 a                      | 98.3 $\pm$ 0.9 b                         |
| C <sub>2</sub> species     | <i>Steinchisma hians</i>         | 0.81 $\pm$ 0.07 b                      | 99.6 $\pm$ 0.2 b                         |
|                            | <i>Homolepis aturensis</i>       | 0.73 $\pm$ 0.06 b                      | 98.8 $\pm$ 0.6 b                         |
| C <sub>3</sub> species     | Peroxisomes                      |                                        |                                          |
|                            | <i>Dicanthelium oligosanthes</i> | 0.03 $\pm$ 0.01                        | 18.9 $\pm$ 7.1 a                         |
|                            | <i>Panicum bisulcatum</i>        | 0.10 $\pm$ 0.02 a                      | 41.4 $\pm$ 7.6 a                         |
| C <sub>3</sub> -Protokranz | <i>Steinchisma laxum</i>         | 0.10 $\pm$ 0.01 a                      | 80.0 $\pm$ 7.4 b                         |
| C <sub>2</sub> species     | <i>Steinchisma hians</i>         | 0.27 $\pm$ 0.04 b                      | 92.9 $\pm$ 4.6 b                         |
|                            | <i>Homolepis aturensis</i>       | 0.22 $\pm$ 0.03 b                      | 91.4 $\pm$ 4.0 b                         |

**Supplementary Table S5.** Organelle parameters in the mesophyll and bundle sheath cells of nine species of grasses in the Panicoideae. Values represent means  $\pm$  SE. Values followed by the same letter are not different from one another as determined by one-way ANOVA and the Tukey's post-hoc test.

|                            |                                      | Mitochondria<br>Planar<br>Area/Planar<br>Cell Area, % | Mitochondria<br>number<br>/Planar Cell<br>Area,<br>$\mu\text{m}^{-2} \times 10^{-3}$ | Density of Gold<br>Labeling/<br>Planar<br>Mitochondria<br>Area, $\mu\text{m}^{-2}$ | Density of<br>Gold<br>Labeling/<br>Planar Cell<br>Area, $\mu\text{m}^{-2}$ | Peroxisome<br>Planar<br>Area/Planar Cell<br>Area, % | Peroxisome<br>number /Planar<br>Cell Area, $\mu\text{m}^{-2}$<br>$\times 10^{-3}$ | Chloroplast<br>Planar<br>Area/Planar Cell<br>Area, % | Chloroplast<br>number<br>/Planar Cell<br>Area, $\mu\text{m}^{-2}$<br>$\times 10^{-3}$ |
|----------------------------|--------------------------------------|-------------------------------------------------------|--------------------------------------------------------------------------------------|------------------------------------------------------------------------------------|----------------------------------------------------------------------------|-----------------------------------------------------|-----------------------------------------------------------------------------------|------------------------------------------------------|---------------------------------------------------------------------------------------|
| <b>Mesophyll Cells</b>     |                                      |                                                       |                                                                                      |                                                                                    |                                                                            |                                                     |                                                                                   |                                                      |                                                                                       |
| C <sub>3</sub> species     | <i>Dicanthelium<br/>oligosanthes</i> | 0.50 $\pm$ 0.05 a                                     | 30 $\pm$ 3 ac                                                                        | 63.1 $\pm$ 2.5 a                                                                   | 0.314 $\pm$ 0.03 a                                                         | 0.323 $\pm$ 0.038 a                                 | 13 $\pm$ 1 ab                                                                     | 26.9 $\pm$ 1.8 a                                     | 26 $\pm$ 1 a                                                                          |
|                            | <i>Panicum bisulcatum</i>            | 0.29 $\pm$ 0.04 a                                     | 16 $\pm$ 2 b                                                                         | 76.4 $\pm$ 4.8 a                                                                   | 0.194 $\pm$ 0.02 a                                                         | 0.333 $\pm$ 0.050 a                                 | 11 $\pm$ 2 ab                                                                     | 28.7 $\pm$ 1.7 a                                     | 27 $\pm$ 2 a                                                                          |
| C <sub>3</sub> -Protokranz | <i>Steinchisma laxum</i>             | 0.39 $\pm$ 0.03 ab                                    | 34 $\pm$ 3 a                                                                         | 83.5 $\pm$ 5.5 a                                                                   | 0.304 $\pm$ 0.02 a                                                         | 0.588 $\pm$ 0.056 a                                 | 21 $\pm$ 2 a                                                                      | 30.3 $\pm$ 1.6 a                                     | 33 $\pm$ 2 ab                                                                         |
| C <sub>2</sub> species     | <i>Homolepis aturensis</i>           | 0.30 $\pm$ 0.06 bc                                    | 20 $\pm$ bc                                                                          | 1.3 $\pm$ 0.3 b                                                                    | 0.005 $\pm$ 0.00 b                                                         | 0.376 $\pm$ 0.059 a                                 | 7 $\pm$ 1 b                                                                       | 17.7 $\pm$ 1.2 b                                     | 27 $\pm$ 1 a                                                                          |
|                            | <i>Steinchisma hians</i>             | 0.39 $\pm$ 0.04 ab                                    | 37 $\pm$ 3 a                                                                         | 1.5 $\pm$ 0.4 b                                                                    | 0.007 $\pm$ 0.002b                                                         | 0.414 $\pm$ 0.052 a                                 | 20 $\pm$ 3 a                                                                      | 28.2 $\pm$ 1.6 a                                     | 48 $\pm$ 2 b                                                                          |
|                            | <i>Neurachne minor</i>               | 0.59 $\pm$ 0.07                                       | 22 $\pm$ 3                                                                           | 2.2 $\pm$ 0.3                                                                      | 0.012 $\pm$ 0.002                                                          | 0.011 $\pm$ 0.002                                   | 3 $\pm$ 1                                                                         | 19.6 $\pm$ 1.6                                       | 28 $\pm$ 2                                                                            |
| C <sub>4</sub> species     | <i>Setaria viridis</i>               | 0.13 $\pm$ 0.02c, d                                   | 12 $\pm$ 3 b                                                                         | 0.7 $\pm$ 0.3 b                                                                    | 0.001 $\pm$ 0.000b                                                         | 0.005 $\pm$ 0.003 b                                 | 1 $\pm$ 0.00 c                                                                    | 14.6 $\pm$ 1.1 b                                     | 11 $\pm$ 1                                                                            |
|                            | <i>Panicum virgatum</i>              | 0.09 $\pm$ 0.02 d                                     | 12 $\pm$ 2 b                                                                         | 4.61 $\pm$ 1.1 b                                                                   | 0.007 $\pm$ 0.002b                                                         | 0.002 $\pm$ 0.002 b                                 | 3 $\pm$ 0.00 c                                                                    | 12.3 $\pm$ 0.9 b                                     | 22 $\pm$ 2 a                                                                          |
| <b>Bundle Sheath Cells</b> |                                      |                                                       |                                                                                      |                                                                                    |                                                                            |                                                     |                                                                                   |                                                      |                                                                                       |
| C <sub>3</sub> species     | <i>Dicanthelium<br/>oligosanthes</i> | 0.28 $\pm$ 0.03 a                                     | 30 $\pm$ 3 ac                                                                        | 6.0 $\pm$ 0.8 a                                                                    | 0.02 $\pm$ 0.00 a                                                          | 0.044 $\pm$ 0.016 a                                 | 3 $\pm$ 1 a                                                                       | 3.8 $\pm$ 0.4 a                                      | 12 $\pm$ 1 a                                                                          |
|                            | <i>Panicum bisulcatum</i>            | 0.24 $\pm$ 0.03 a                                     | 25 $\pm$ 4 a                                                                         | 33.7 $\pm$ 3.2cd                                                                   | 0.08 $\pm$ 0.01 ab                                                         | 0.152 $\pm$ 0.033 b, c                              | 8 $\pm$ 2 bcd                                                                     | 7.6 $\pm$ 0.5 bc                                     | 22 $\pm$ 1 b                                                                          |
| C <sub>3</sub> -Protokranz | <i>Steinchisma laxum</i>             | 0.27 $\pm$ 0.02 a                                     | 20 $\pm$ 2 a                                                                         | 109.9 $\pm$ 6.2 b                                                                  | 0.27 $\pm$ 0.02 bc                                                         | 0.105 $\pm$ 0.015 b, c                              | 4 $\pm$ 1 a, c                                                                    | 4.9 $\pm$ 0.5 ab                                     | 11 $\pm$ 1 a                                                                          |
| C <sub>2</sub> species     | <i>Homolepis aturensis</i>           | 0.73 $\pm$ 0.06 b                                     | 32 $\pm$ 3 ac                                                                        | 47.2 $\pm$ 2.1 cd                                                                  | 0.35 $\pm$ 0.03 c                                                          | 0.227 $\pm$ 0.027 b                                 | 7 $\pm$ 1 c, d                                                                    | 8.3 $\pm$ 0.7 bc                                     | 16 $\pm$ 1 ac                                                                         |
|                            | <i>Steinchisma hians</i>             | 0.81 $\pm$ 0.06 b                                     | 53 $\pm$ 3 b                                                                         | 92.2 $\pm$ 3.7 b                                                                   | 0.74 $\pm$ 0.05 d                                                          | 0.266 $\pm$ 0.040 b                                 | 12 $\pm$ 1 d                                                                      | 11.2 $\pm$ 0.8 ce                                    | 20 $\pm$ 1 bc                                                                         |
|                            | <i>Neurachne minor</i>               | 6.95 $\pm$ 0.80                                       | 183 $\pm$ 0.018                                                                      | 49.6 $\pm$ 1.7                                                                     | 3.39 $\pm$ 0.34                                                            | 0.002 $\pm$ 0.001                                   | 5 $\pm$ 2                                                                         | 32.5 $\pm$ 2.4                                       | 44 $\pm$ 3                                                                            |
| C <sub>4</sub> species     | <i>Panicum virgatum</i>              | 0.74 $\pm$ 0.07 b                                     | 40 $\pm$ 4 bc                                                                        | 52.3 $\pm$ 1.7 c                                                                   | 0.38 $\pm$ 0.03 c, d                                                       | 0.069 $\pm$ 0.014 ac                                | 3 $\pm$ 1 ab                                                                      | 18.5 $\pm$ 1.5 de                                    | 18 $\pm$ 1 bc                                                                         |
|                            | <i>Setaria viridis</i>               | 0.64 $\pm$ 0.08 b                                     | 30 $\pm$ 3 ac                                                                        | 28.0 $\pm$ 2.4 ad                                                                  | 0.17 $\pm$ 0.02 b                                                          | 0.062 $\pm$ 0.017 ac                                | 4 $\pm$ 1 a, bc                                                                   | 41.8 $\pm$ 1.7 d                                     | 21 $\pm$ 1 b                                                                          |
